# Supplementary material for: Trimming of sequence reads alters RNA-Seq gene expression estimates
Source: PubMed Central journal article supplement (PMC4766705; doi:10.1186/s12859-016-0956-2), 2016-02-25

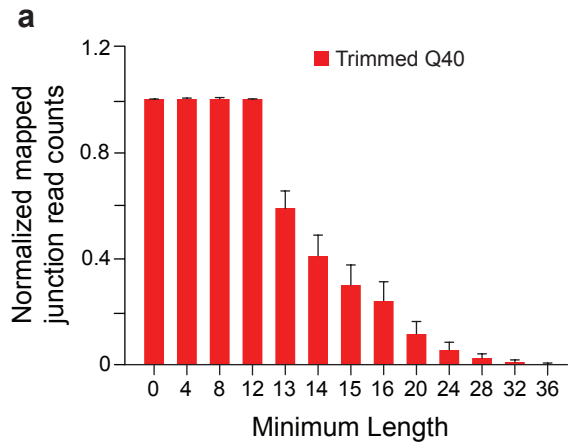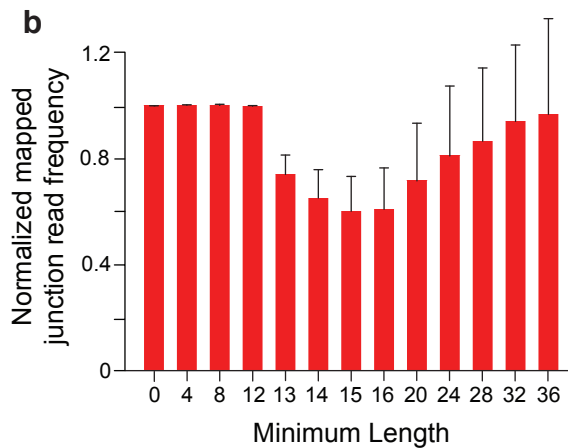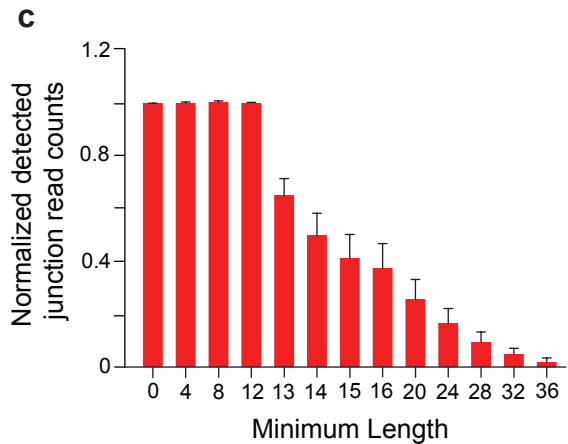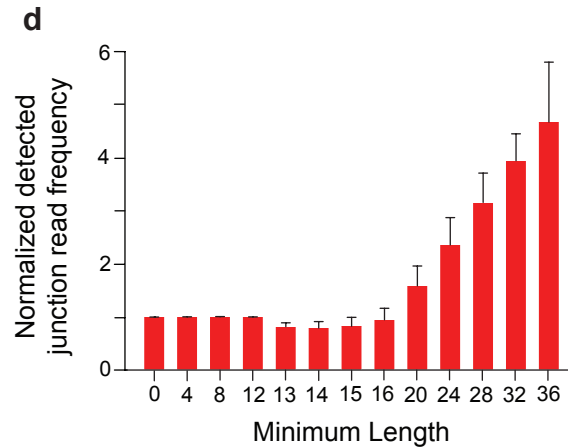

Supplement: 12859_2016_956_MOESM6_ESM.pdf [file 12859_2016_956_MOESM6_ESM.pdf]
