# Supplementary material for: Trimming of sequence reads alters RNA-Seq gene expression estimates
Source: PubMed Central journal article supplement (PMC4766705; doi:10.1186/s12859-016-0956-2), 2016-02-25
Supplement: 12859_2016_956_MOESM7_ESM.pdf [file 12859_2016_956_MOESM7_ESM.pdf]

**Additional File 7. Commands used for analysis tools.**

| <b>Analysis Tool</b> | <b>Use</b>                        | <b>Example Command</b>                                                                                                                                                                                                                                                                                                               |
|----------------------|-----------------------------------|--------------------------------------------------------------------------------------------------------------------------------------------------------------------------------------------------------------------------------------------------------------------------------------------------------------------------------------|
| SolexaQA             | Trimming                          | SolexaQA++ dynamictrim -h 10 pns1.fastq                                                                                                                                                                                                                                                                                              |
| SolexaQA             | Length filtering                  | SolexaQA++ lengthsort -l 36 pns1.fastq.trimmed                                                                                                                                                                                                                                                                                       |
| Trimmomatic          | Trimming                          | java -jar trimmomatic-0.33.jar SE -threads 2 -trimlog pns1_trimlog -phred33 pns1.fastq pns1_trim.fastq SLIDINGWINDOW:4:10                                                                                                                                                                                                            |
| ConDeTri             | Trimming                          | condetri_v2.2.pl -fastq1=pns1.fastq -prefix=pns1_cdt -hq=10 -lq=5 -minlen=1 -sc=33                                                                                                                                                                                                                                                   |
| Tophat2              | Mapping                           | tophat2 -p 2 --transcriptome-index=genes_all genome_all pns1.fastq.trimmed                                                                                                                                                                                                                                                           |
| Tophat2              | Mapping, multi-hits excluded      | tophat2 -p 2 -g 1 -M -x 1 --transcriptome-index=genes_all genome_all pns1.fastq.trimmed                                                                                                                                                                                                                                              |
| Tophat2              | Mapping, novel junctions disabled | tophat2 -p 2 --transcriptome-index=genes_all --no-novel-juncs genome_all pns1.fastq.trimmed                                                                                                                                                                                                                                          |
| HTseq                | Counting alignments               | htseq-count --stranded=no accepted_hits.sam genes_all.gtf > accepted_hits.counts                                                                                                                                                                                                                                                     |
| STAR                 | Mapping                           | STAR --runThreadN 2 --genomeDir fb604genome/star/ --readFilesIn pns1.fastq.trimmed --quantMode GeneCounts                                                                                                                                                                                                                            |
| RSEM / STAR          | Mapping                           | rsem-calculate-expression --star -p 2 pns1.fastq.trimmed fb604genome/rsem/genome_all pns1                                                                                                                                                                                                                                            |
| Cuffdiff2            | Differential expression           | cuffdiff -b genome_all.fa -p 2 -L untrimmed,trimmed -u genes_all.gtf untrimmed/pns1/accepted_hits.bam,untrimmed/pns2/accepted_hits.bam,untrimmed/pns3/accepted_hits.bam,untrimmed/pns4/accepted_hits.bam trimmed/pns1/accepted_hits.bam,trimmed/pns2/accepted_hits.bam,trimmed/pns3/accepted_hits.bam,trimmed/pns4/accepted_hits.bam |
| DESeq2               | Differential expression           | R functions used were: DESeq, results                                                                                                                                                                                                                                                                                                |
| EdgeR                | Differential expression           | R functions used were: calcNormFactors, estimateCommonDisp, estimateTagwiseDisp, exactTest, and topTags                                                                                                                                                                                                                              |
